# Supplementary material for: Combined Effects of Baicalein and Docetaxel on Apoptosis in 8505c Anaplastic Thyroid Cancer Cells via Downregulation of the ERK and Akt/mTOR Pathways
Source: PubMed Central journal article supplement — Endocrinol Metab (Seoul). 2018 Mar 21;33(1):121–32. doi: 10.3803/EnM.2018.33.1.121 (PMC5874188; doi:10.3803/enm.2018.33.1.121), 2018-03-21
Supplement: enm-33-121-s001.pdf [file enm-33-121-s001.pdf]

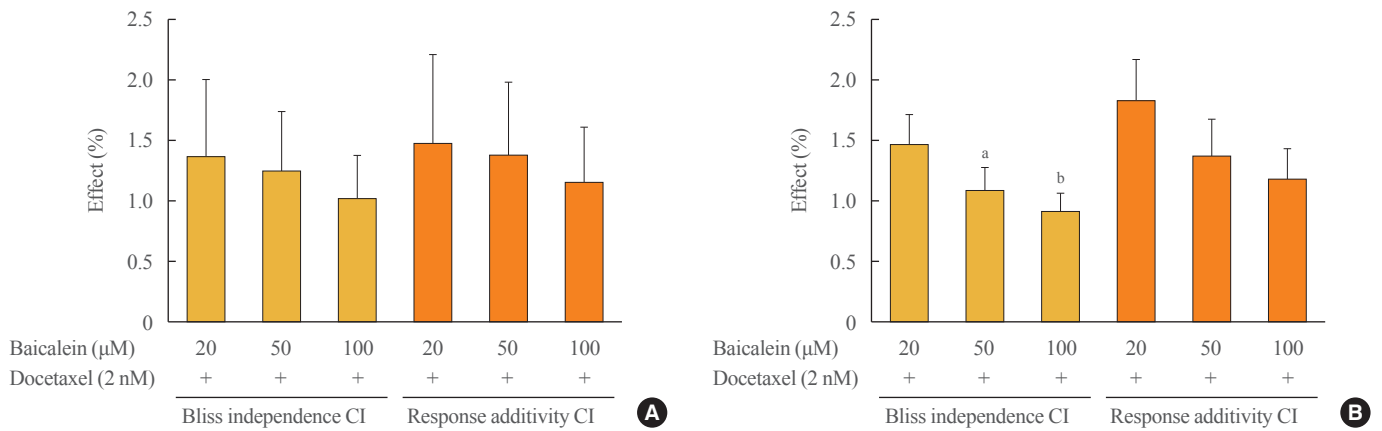

**Supplemental Fig. S1.** The combination index of baicalein and docetaxel for cell viability in 8505c cells. The combination index was calculated from the Bliss independence model described by the equation  $CI = (E_A + E_B - [E_A \times E_B]) / E_{AB}$ , where CI is the combination index,  $E_A$  is the effect of drug A (baicalein),  $E_B$  is the effect of drug B (docetaxel), and  $E_{AB}$  is the combined effect of A and B at 24 hours (A) and 48 hours (B). <sup>a</sup> $P < 0.05$ ; <sup>b</sup> $P < 0.01$  vs. baicalein (20 μM) and docetaxel (2 nM).
